# Supplementary material
Source: MDPI journal article supplement (https://www.mdpi.com/1999-4907/12/10/1425)
Supplement: s1 [file s1]

Archive with 2 entries (2 files):
- Supplementary S2.pdf
- Table S1.xlsx
