# Supplementary material
Source: MDPI journal article supplement (https://www.mdpi.com/1999-4907/12/10/1425)
Supplement: s1 [file s1 › Table S1.xlsx]

## Sheet: stands
No	Loc_ID	Country	longitude	latitude	Name	Type of sampled location	Remark
1	16	Belarus	28.0252	53.8763	Minsk	stand
2	239	Belarus	30.6759	55.072	Vitebsk	stand
3	434	Belarus	24.7367	53.604	Shuchinskii	stand
4	435	Belarus	23.7928	53.6858	Gorodnenskii	stand
5	436	Belarus	25.3367	52.7055	Ivatzrviskii	stand
6	504	Belarus	30.1931	55.1517	Gorokskii	stand
7	217	Bosnia_HZG	17.5427	45.0979	Srbac	provenance trial in Germany
8	218	Bulgaria	25.4737	43.6213		provenance trial in Germany
9	216	Croatia	18.1333	45.5833	Topolovac	provenance trial in Germany
10	219	Croatia	18.7965	45.259	Vinkovci	provenance trial in Germany
11	431	Finland	23.4647	59.9856	Tammisaari road	stand
12	5	France	0.0938	44.2058	Lot-et-Garonne	stand
13	426	France	2.54052	48.3865	Ȋle-de-France Milly-la-Forȇt	stand
14	6	Germany	6.80599	51.7186	Daemmerwald	stand
15	7	Germany	8.57315	52.4114	Grosser Bruch	stand
16	8	Germany	8.11383	51.8378	Geisterholz	stand
17	9	Germany	7.07078	50.6549	Kottenforst	stand
18	15	Germany	8.68811	52.3896	Mindener Wald	stand
19	86	Germany	8.11689	51.4689	Forstamt Arnsberger Wald, 0493	stand
20	197	Germany	9.49941	54.5652	Försterei Idstedtwege, 3448 b	stand
21	198	Germany	9.74247	54.179	Försterei Haale, 3764 d	stand
22	221	Germany	8.31064	51.3701	Forstamt Oberes Sauerland, Heidbell	stand
23	222	Germany	8.00113	51.3539	Forstamt Arnsberger Wald, 0337	stand
24	223	Germany	7.89232	51.4142	Forstamt Arnsberger Wald, 0405	stand
25	224	Germany	8.08595	51.4372	Forstamt Arnsberger Wald, 0288	stand
26	225	Germany	8.11184	51.8314	Forstamt Münsterland, 0094	stand
27	227	Germany	7.58806	51.8531	Forstamt Münsterland, 0655	stand
28	228	Germany	7.53805	51.7245	Forstamt Münsterland, 0817	stand
29	229	Germany	6.79927	51.7159	Forstamt Niederrhein, 2320	stand
30	233	Germany	7.15613	50.9544	Forstamt Bergisches Land, 7127	stand
31	234	Germany	7.56608	50.9655	Forstamt Bergisches Land, Enselskamp	stand
32	236	Germany	12.5297	50.9893	Forstamt Weida, Revier Leina, 126b2	stand
33	237	Germany	12.234	50.6951	Forstamt Weida, Revier Waldhaus, 8665a8	stand
34	238	Germany	11.6635	50.7684	Forstamt Jena-Holzland, Revier Wolfersdorf, 25a4	stand
35	320	Germany	11.9565	54.0721	Forstamt Bad Doberan, Revier Ivendorf 1183a	stand
36	321	Germany	12.0528	53.4253	Forstamt Karbow, Revier Kreien 5359a1	stand
37	322	Germany	11.2111	53.5162	Forstamt Radelübbe, Revier Dümmer 4103a2	stand
38	323	Germany	11.9002	53.8261	Forstamt Schlemmin, Revier Qualitz 1481a10	stand
39	324	Germany	12.8869	54.2287	Forstamt Schuenhagen, Revier Lendershagen 3283a3	stand
40	325	Germany	13.1343	53.4004	Forstamt Neustrelitz, Revier Wilhelminenhof 5132b3	stand
41	335	Germany	6.70728	49.7623	Forstamt Hochwald, Revier Waldrach, 3 243 a0	stand
42	336	Germany	8.37013	49.4192	Forstamt Rheinauen, Revier Schifferstadt, 1 6 c0, 1 7 a0	stand
43	337	Germany	7.78087	50.4052	Forstamt Neuhäusel, Revier Elbert-Augst, 0 16 a0	stand
44	340	Germany	9.63574	47.8568	Untere Forstbehörde Ravensburg, Revier 15	stand
45	341	Germany	8.89078	48.4366	Untere Forstbehörde Tübingen, Revier 27	stand
46	343	Germany	9.71038	48.4998	Untere Forstbehörde Alb-Donau-Kreis, Revier 14	stand
47	344	Germany	8.56089	49.2174	Untere Forstbehörde Karlsruhe	stand
48	345	Germany	8.75554	48.9671	Untere Forstbehörde Enzkreis	stand
49	346	Germany	8.60446	47.9243	Untere Forstbehörde Tuttlingen	stand
50	347	Germany	7.93235	48.6192	Untere Forstbehörde Ortenaukreis	stand
51	348	Germany	8.6067	49.2159	Untere Forstbehörde Karlsruhe	stand
52	349	Germany	7.88731	48.4756	Untere Forstbehörde Ortenaukreis	stand
53	350	Germany	8.89112	48.9704	Untere Forstbehörde Enzkreis	stand
54	352	Germany	7.96693	48.603	Untere Forstbehörde Ortenaukreis	stand
55	353	Germany	7.87155	48.4878	Forstamt Ortenaukreis, Revier Offenburg-Hohberg, Abteilung 62	stand
56	354	Germany	8.55772	49.1549	Forstamt Karlsruhe Landkreis, Revier Büchenauer Hardt, Abteilung 7	stand
57	359	Germany	11.0633	49.525	Forstbetrieb Nürnberg, Au	stand
58	361	Germany	10.4594	48.0908	Forstbetrieb Ottobeuren, Mindelberg	stand
59	362	Germany	12.7933	48.1858	Forstbetrieb Wasserburg am Inn, Klosterholz	stand
60	364	Germany	11.6522	48.4072	Forstbetrieb Freising, Rehbuckel	stand
61	365	Germany	12.9678	47.8581	Forstbetrieb Berchtesgaden, Eichet	stand
62	366	Germany	11.4819	49.1544	Forstbetrieb Kelheim, Hochbrunnen	stand
63	367	Germany	11.4356	49.2025	Forstbetrieb Allersberg, Birkenmühl	stand
64	368	Germany	11.9867	49.2075	Forstbetrieb Burglengenfeld, Baumschulschacht	stand
65	372	Germany	11.4481	49.8769	Forstbetrieb Pegnitz, Glashüttener Wald	stand
66	373	Germany	11.5983	48.7192	Forstbetrieb Freising, Badertaferl	stand
67	376	Germany	8.50035	53.0576	NFA Neuenburg, Hasbruch, 301a	stand
68	377	Germany	8.38149	52.3232	NFA Ankum, Bohmte, 561a,j	stand
69	378	Germany	8.09378	52.3122	NFA Ankum, Iburg, 2302b	stand
70	379	Germany	9.54654	52.1737	NFA Saupark, Jägerhaus, 20 b	stand
71	380	Germany	9.52094	51.7279	NFA Dassel, Steinborn, 2119 b	stand
72	381	Germany	10.0765	51.611	NFA Reinhausen, Ebergötzen, 2309 c	stand
73	382	Germany	10.1238	51.52	NFA Reinhausen, Klein Lengden, 19 b	stand
74	383	Germany	9.19562	53.5428	NFA Harsefeld, Bevern, 414 a 2	stand
75	384	Germany	10.2914	52.2612	NFA Wolfenbüttel, Peine, 2 a1	stand
76	386	Germany	10.7112	52.367	NFA Wolfenbüttel, Königslutter, 1 a1	stand
77	387	Germany	10.9958	52.3608	NFA Wolfenbüttel, Bahrdorf, 406 b	stand
78	388	Germany	8.96484	53.4711	NFA Harsefeld, Hinzel, 1175 a1	stand
79	389	Germany	11.176	53.1002	NFA Göhrde, Siemen, 2251 c	stand
80	390	Germany	12.0883	52.0708	Forstbetrieb Anhalt, Revier Nedlitz, 3520 a 2	stand
81	391	Germany	12.2733	51.7773	Forstbetrieb Anhalt, Revier Mosigkauer Heide, 4141 f 1	stand
82	392	Germany	12.0897	52.0705	Forstbetrieb Anhalt, Revier Nedlitz, 3519 c 2	stand
83	393	Germany	11.7777	51.2357	Forstbetrieb Süd, Revier Burgenland, 54 a 4	stand
84	394	Germany	12.1603	51.3706	Forstbetrieb Süd, Revier Annarode, 334 b 1	stand
85	395	Germany	11.7675	52.4435	Forstbetrieb Altmark, Revier Mahlpfuhl, 3404 a 4 + a 3	stand
86	396	Germany	12.3331	52.0517	Forstbetrieb Anhalt, Revier Hoher Fläming, 1224 a 4	stand
87	397	Germany	11.1194	52.8021	Forstbetrieb Altmark, Revier Salzwedel, 4628 a 0	stand
88	398	Germany	9.10317	50.7399	Romrod, Maulbach, 82B	stand
89	401	Germany	9.61763	51.4478	Reinhardshagen, Wilhelmshausen, 506B	stand
90	404	Germany	9.43679	51.5119	Reinhardshagen, Beberbeck, 1703;1706;1710	stand
91	405	Germany	8.91198	50.6334	Wettenberg, Reiskirchen, 1070	stand
92	407	Germany	8.98587	50.4234	Nidda, Stornfels/Eichelsdorf, 404A	stand
93	409	Germany	9.30279	50.2313	Jossgrund, Kassel, 2524A;2528A;2529	stand
94	411	Germany	8.54594	49.9555	Groß Gerau, Wiesental, 10A;13;14	stand
95	413	Germany	8.87801	49.8972	Dieburg, Groß-Zimmern, 156A;158;163;164A	stand
96	414	Germany	9.4033	50.2637	Schlüchtern, Salmünster, 54A;55B	stand
97	415	Germany	9.21478	54.4462	Försterei Idstedtwege, 4808 a	stand
98	416	Germany	9.61602	54.1474	Försterei Haale, 3733 a	stand
99	418	Germany	9.84267	54.3688	Försterei Hütten, 3010 d	stand
100	419	Germany	9.57207	54.7062	Försterei Satrup, 3310 c2	stand
101	420	Germany	13.0942	52.445		stand
102	421	Germany	13.8849	51.9423		stand
103	422	Germany	13.7368	52.9271		stand
104	423	Germany	14.122	52.3701		stand
105	424	Germany	11.415	53.0792		stand
106	425	Germany	11.6692	53.053		stand
107	429	Germany	8.098	51.3831	Rumbeck	stand
108	11	Hungary	20.6881	48.0848	Kisgyör	stand
110	12	Italy	8.39583	45.4267	Lame del Sesia	stand
111	213	Latvia	24.086	56.9357		provenance trial	Russia, Krapivensky Forest, setup 1976-1981
112	14	Poland	22.7783	51.4681	Lubartow	stand
113	10	Russia	58.335	52.976	Kuseyev08	stand
114	240	Russia	37.111	51.3913	Kursk	stand
115	241	Russia	46.4746	52.455	Saratov2	stand
116	242	Russia	45.1951	50.1236	Kamyshin	stand
117	243	Russia	49.534	53.3053	Tolyatti	stand
118	244	Russia	35.2781	56.2202	Rzhev	stand
119	245	Russia	29.301	56.1943	Pskov	stand
120	246	Russia	40.2833	49.5963	Boguchar	stand
121	247	Russia	41.171	52.445	Tambov	stand
122	248	Russia	45.473	51.3735	Saratov3	stand
123	249	Russia	43.1591	48.458	Volgograd	stand
124	250	Russia	38.74	53.4758	Tula	stand
125	251	Russia	54.918	52.37	Orenburg1	stand
126	252	Russia	39.239	53.184	Lipetsk	stand
127	253	Russia	35.525	54.5729	Kaluga	stand
128	254	Russia	51.4419	54.3621	Cheremshan	stand
129	256	Russia	50.3456	54.1253	Samara2	stand
130	257	Russia	35.27	52.5824	Orel	stand
131	258	Russia	45.0652	54.1649	Saransk	stand
132	259	Russia	48.2771	52.8176	Sizran	stand
133	260	Russia	46.3556	54.255	UlyanovskA	stand
134	261	Russia	39.054	51.3831	Voronezh	stand
135	262	Russia	48.3021	54.1916	Ulyanovsk	stand
136	263	Russia	43.67	53.023	Penza	stand
137	264	Russia	34.1231	53.164	Bryansk	stand
138	265	Russia	57.1163	54.449	Arc1m	stand
139	266	Russia	57.2558	54.517	Arc1k	stand
140	267	Russia	56.8028	54.3973	ArcA	stand
141	268	Russia	56.7983	54.4205	Arc2	stand
142	269	Russia	54.8053	54.6807	Blg	stand
143	270	Russia	53.6335	53.5649	Orenburg2	stand
144	271	Russia	53.6335	52.1877	Orenburg3	stand
145	272	Russia	51.1033	53.0581	Samara3	stand
146	273	Russia	53.5121	54.4415	Tuymazy	stand
147	274	Russia	59.1465	56.2083	Chelyabe	stand
148	275	Russia	55.7793	56.7896	Sarashi	stand
149	276	Russia	58.3167	55.4886	Myasogut	stand
150	277	Russia	55.6473	55.8623	Burai	stand
151	278	Russia	58.7274	56.205	Potashki	stand
152	279	Russia	57.0294	54.8386	Urman	stand
153	282	Russia	55.6012	55.4828	Birsk	stand
154	284	Russia	50.0175	55.645	Tat1	stand
155	285	Russia	52.6222	55.6456	Tat2	stand
156	286	Russia	41.6942	55.3619	Vld1	stand
157	287	Russia	41.9411	55.5156	Vld2	stand
158	288	Russia	32.3481	60.0664	Lng1	stand
159	289	Russia	30.32	59.755	Lng2	stand
160	290	Russia	30.1225	59.5625	Lng3_A	stand
161	291	Russia	31.3919	59.2647	Lng4	stand
162	293	Russia	38.1933	55.4614	Msk2	stand
163	294	Russia	38.7581	55.1469	Msk3	stand
164	295	Russia	38.9008	55.0683	Msk4	stand
165	296	Russia	38.95	55.0067	Msk5	stand
166	297	Russia	39.9128	59.2275	Vlg1	stand
167	298	Russia	36.8472	58.9375	Vlg2	stand
168	299	Russia	43.3069	55.9989	Ngg1	stand
169	300	Russia	44.3044	56.1003	Ngg2	stand
170	301	Russia	46.05	56.0017	Ngg3	stand
171	302	Russia	35.5922	56.9136	Tvr1	stand
172	303	Russia	35.9161	56.8472	Tvr2_A	stand
173	304	Russia	54.4783	55.3628	Ils	stand
174	305	Russia	39.3686	54.7792	Rzn1	stand
175	306	Russia	39.5597	54.6806	Rzn2	stand
176	307	Russia	39.9617	54.9906	Rzn3	stand
177	308	Russia	50.1561	57.6361	Kir1	stand
178	310	Russia	48.5297	58.45	Kir3	stand
179	311	Russia	54.0075	56.3156	Udm1	stand
180	312	Russia	53.745	56.6367	Udm2	stand
181	316	Russia	41.5497	58.4822	Kst2	stand
182	317	Russia	47.9325	56.1767	Mar	stand
183	318	Russia	48.5428	55.8922	Chv	stand
184	326	Russia	82.8804	55.0601	Nvs_A	stand
185	327	Russia	65.4695	57.1599	Tym_A	stand
186	328	Russia	58.2377	55.173	Mlz1	stand
187	329	Russia	55.6929	56.5518	Dg	stand
188	330	Russia	73.3103	55.0209	Oms_A	stand
189	437	Russia	57.32	52.23	Zilair	stand
190	500	Russia	55.8469	55.154	Blagovechensk	stand
191	501	Russia	56.1366	55.4775	Babai	stand
192	502	Russia	56.7219	55.8347	Karaidel	stand
193	503	Russia	58.335	52.976	Kuseyevo saplingA	stand
194	210	Ukraine	28.382	49.2937	VN	provenance trial	Russia, Krapivensky Forest, setup 1976-1977
195	211	Ukraine	26.4714	50.9271	RK	provenance trial	Russia, Krapivensky Forest, setup 1976-1978
196	212	Ukraine	31.3258	51.4903	CHRN	provenance trial	Russia, Krapivensky Forest, setup 1976-1979
197	255	Ukraine	40.1543	48.2613	Masalovka	stand
198	430	Ukraine	37.9295	49.0528	Svyatogorye	provenance trial	Russia, Krapivensky Forest, setup 1976-1980
